# Supplementary material for: Prevalence of pulmonary hypertension in mitral regurgitation and its influence on outcomes
Source: PubMed Central journal article supplement — Open Heart. 2023 Jun 6;10(1):e002268. doi: 10.1136/openhrt-2023-002268 (PMC10254941; doi:10.1136/openhrt-2023-002268), 2023-06-06
Supplement: openhrt-2023-002268supp001.pdf [file openhrt-2023-002268supp001.pdf]

**Supplementary Materials****Supplementary table 1. Baseline Characteristics of Study Cohort stratified by sex**

|                                             | <b>Male<br/>n = 3645</b> | <b>Female<br/>N = 6038</b> | <b>P value</b> |
|---------------------------------------------|--------------------------|----------------------------|----------------|
| <b>Demographics</b>                         |                          |                            |                |
| Age, years                                  | 75 ± 12                  | 77 ± 13                    | <0.0001        |
| <b>Anthropometrics</b>                      |                          |                            |                |
| BMI                                         | 26.51±5.03               | 26.12 ± 5.99               | <0.0001        |
| BSA                                         | 1.95±0.21                | 1.70 ± 0.21                | <0.0001        |
| <b>Rhythm</b>                               |                          |                            |                |
| Atrial fibrillation / atrial arrhythmia     | 1506 (41.3)              | 2266 (37.5)                | 0.001          |
| <b>LV dimensions and function</b>           |                          |                            |                |
| LVEF %                                      | 68.60±7.40               | 69.71±7.58                 | <0.0001        |
| E:e' ratio                                  | 13.56±5.14               | 14.65±6.13                 | <0.0001        |
| LVEDD                                       | 5.14±0.74                | 4.58±0.66                  | <0.0001        |
| LVESD                                       | 3.10±0.65                | 2.71 ±0.55                 | <0.0001        |
| <b>Atrial dimensions</b>                    |                          |                            |                |
| LA volume index, mL/m <sup>2</sup>          | 95.34±54.04              | 85.98±48.34                | <0.0001        |
| RA area, cm <sup>2</sup>                    | 31.72±9.64               | 25.63±8.81                 | <0.0001        |
| <b>Right heart dimensions and function</b>  |                          |                            |                |
| eRVSP, mmHg                                 | 44.05±12.78              | 44.40±13.15                | 0.003          |
| TR peak velocity, m/s                       | 2.90±0.49                | 2.92±0.49                  | <0.0001        |
| RV basal diameter                           | 3.53±0.42                | 3.28±0.39                  | <0.0001        |
| Dilated RV                                  | 1515 (41.6)              | 1334 (22.1)                | <0.0001        |
| Impaired RV function                        | 109 (3.0)                | 128 (2.1)                  | <0.0001        |
| <b>Mitral valve dimensions and function</b> |                          |                            |                |
| MV mean gradient, mmHg                      | 2.63 ± 1.24              | 2.93 ± 1.21                | <0.0001        |
| <b>Concomitant valvular pathology</b>       |                          |                            |                |
| ≥ moderate aortic regurgitation             | 389 (10.7)               | 696 (11.5)                 | <0.0001        |
| Severe AS < 1cm <sup>2</sup>                | 107 (2.9)                | 288 (4.8)                  | 0.05           |

Values are n (%) unless otherwise indicated. eRVSP = estimated right ventricular systolic pressure (mmHg); BMI = body mass index; BSA = body surface area; LVEF = left ventricular ejection fraction; LVEDD = left ventricular end diastolic diameter; LVESD = left ventricular end systolic diameter; LA = left atrial; RA = right atrial; TR = tricuspid regurgitant; RV = right ventricle; AV = aortic valve; VTI = velocity time integral.

**Supplementary Table 2. Survival Profile and Adjusted Risk for Mortality According to Estimated Right Ventricular Systolic Pressure Levels**

|                                                    | <b>1-Year Actuarial Mortality (n= 9439)</b> | <b>5-Year Actuarial Mortality (n= 6780)</b> | <b>All Fatal Events (n= 9638)</b>  | <b>Cardiovascular mortality (n= 9638)</b> |
|----------------------------------------------------|---------------------------------------------|---------------------------------------------|------------------------------------|-------------------------------------------|
|                                                    | <b>OR (95% CI)</b>                          | <b>OR (95% CI)</b>                          | <b>HR (95% CI)</b>                 | <b>HR (95% CI)</b>                        |
| <b>All individuals n= 9638</b>                     | 1573 (16.7)                                 | 3603 (53.1)                                 | 4614 (47.9)                        | 1777 (18.4)                               |
| <b>Normal eRVSP (&lt;30mmHg) n = 959</b>           | 79/950 (8.5)<br>Reference                   | 192/581 (33.0)<br>Reference                 | 247 (25.8)<br>Reference            | 83 (8.7)<br>Reference                     |
| <b>Borderline PHT (eRVSP 30.00-39.99) N = 2952</b> | 304/2869 (12.0)<br>OR 1.14 (0.87-1.48)      | 791/1970 (40.2)<br>OR 1.18 (0.95-1.46)      | 1098 (37.2)<br>HR 1.20 (1.05-1.38) | 383 (13.0)<br>HR 0.77 (0.61-0.98)         |
| <b>Mild PHT (eRVSP 40.00-49.99) N = 3167</b>       | 468/3088 (17.0)<br>OR 1.52 (1.18-1.97)      | 1179/2280 (51.7)<br>OR 1.60 (1.29-1.97)     | 1612 (50.9)<br>HR 1.54 (1.35-1.76) | 607 (19.2)<br>HR 0.81 (0.65 -1.02)        |
| <b>Moderate PHT (eRSVP 50.00 - 59.99) N = 1588</b> | 342/1533 (25.8)<br>OR 2.19 (1.67-2.86)      | 787/1129 (69.7)<br>OR 2.90 (2.29-3.66)      | 922 (58.1)<br>HR 1.99 (1.73-2.30)  | 383 (24.1)<br>HR 1.20 (0.95-1.52)         |
| <b>Severe PHT (eRVSP &gt;60) N = 1017</b>          | 380/999 (39.7)<br>OR 4.36 (3.32-5.72)       | 654/820 (79.8)<br>OR 4.91 (3.77-6.40)       | 1068 (72.3)<br>HR 2.75 (2.38-3.19) | 321 (31.6)<br>HR 1.62 (1.27-2.06)         |

Analyses adjusted for age, sex and indexed left atrial volume. Values are n (%) or n/M (%), unless otherwise indicated. CI = confidence interval; eRVSP = estimated right ventricular systolic pressure; HR = hazard ratio; OR = odds ratio; PHT = pulmonary hypertension.

**Supplementary table 3. Survival Profile and Adjusted Risk for Mortality According to Estimated Right Ventricular Systolic Pressure Levels in patients with moderate mitral regurgitation (n=8214)**

|                                           | <b>1-Year Actuarial Mortality (n= 7999)</b> | <b>5-Year Actuarial Mortality (n= 5669)</b> | <b>All Fatal Events (n= 8214)</b> | <b>Cardiovascular mortality (n= 8214)</b> |
|-------------------------------------------|---------------------------------------------|---------------------------------------------|-----------------------------------|-------------------------------------------|
|                                           | <b>OR (95% CI)</b>                          | <b>OR (95% CI)</b>                          | <b>HR (95% CI)</b>                | <b>HR (95% CI)</b>                        |
| <b>All individuals n= 8214</b>            | 1484 (14.8)                                 | 2863 (50.5)                                 | 3761 (45.8)                       | 1379 (16.8)                               |
| <b>Normal eRVSP (&lt;30mmHg) n = 847</b>  | 58/839 (6.9)<br>Reference                   | 160/519 (30.8)<br>Reference                 | 211 (24.9)<br>Reference           | 72 (8.5)<br>Reference                     |
| <b>Borderline PHT (eRVSP 30.00-39.99)</b> | 245/2513 (9.7)<br>OR 1.27 (0.94-1.71)       | 666/1713 (38.9)<br>OR 1.22 (1.03-1.54)      | 944 (36.5)<br>HR 1.23 (1.06-1.43) | 315 (12.2)<br>HR 0.71 (0.55-0.92)         |

|                                                           |                                        |                                        |                                    |                                   |
|-----------------------------------------------------------|----------------------------------------|----------------------------------------|------------------------------------|-----------------------------------|
| <b>N = 2589</b>                                           |                                        |                                        |                                    |                                   |
| <b>Mild PHT<br/>(eRVSP 40.00-49.99)<br/>N = 2747</b>      | 372/2677 (13.9)<br>OR 1.69 (1.28-2.26) | 976/1957 (49.9)<br>OR 1.62 (1.30-2.03) | 1364 (49.7)<br>HR 1.55 (1.34-1.79) | 501 (18.2)<br>HR 0.78 (0.60-0.99) |
| <b>Moderate PHT<br/>(eRSVP 50.00 -59.99)<br/>N = 1299</b> | 252/1251 (20.1)<br>OR 2.39 (1.76-3.25) | 606/900 (67.3)<br>OR 2.87 (2.23-3.69)  | 723 (55.7)<br>HR 1.98 (1.69-2.31)  | 284 (21.9)<br>HR 1.10 (0.85-1.42) |
| <b>Severe PHT<br/>(eRVSP &gt;60)<br/>N = 732</b>          | 257/719 (35.7)<br>OR 5.21 (3.80-7.13)  | 455/580 (78.4)<br>OR 5.27 (3.94-7.07)  | 519 (70.9)<br>HR 2.97 (2.53-3.49)  | 207 (28.3)<br>HR 1.50 (1.14-1.96) |

Analyses adjusted for age and sex. Values are n (%) or n/M (%), unless otherwise indicated.

CI = confidence interval; eRVSP = estimated right ventricular systolic pressure; HR = hazard ratio; OR = odds ratio; PHT = pulmonary hypertension.

**Supplementary table 4. Survival Profile and Adjusted Risk for Mortality According to Estimated Right Ventricular Systolic Pressure Levels in patients with severe MR (n = 8293)**

|                                                            | <b>1-Year Actuarial Mortality<br/>(n= 8094)</b> | <b>5-Year Actuarial Mortality<br/>(n= 5793)</b> | <b>All Fatal Events<br/>(n= 8293)</b> | <b>Cardiovascular mortality<br/>(n= 8293)</b> |
|------------------------------------------------------------|-------------------------------------------------|-------------------------------------------------|---------------------------------------|-----------------------------------------------|
|                                                            | <b>OR (95% CI)</b>                              | <b>OR (95% CI)</b>                              | <b>HR (95% CI)</b>                    | <b>HR (95% CI)</b>                            |
| <b>All individuals<br/>n= 8293</b>                         | 1235 (15.3)                                     | 2917 (50.4)                                     | 3812 (46.0)                           | 1419 (17.1)                                   |
| <b>Normal eRVSP<br/>(&lt;30mmHg)<br/>n = 857</b>           | 68/852 (8.0)<br>Reference                       | 164/523 (31.4)<br>Reference                     | 209 (24.4)<br>Reference               | 70 (8.2)<br>Reference                         |
| <b>Borderline PHT<br/>(eRSVP 30.00-39.99)<br/>N = 2634</b> | 234/2566 (9.1)<br>OR 1.09 (0.75-1.32)           | 648/1749 (37.0)<br>OR 1.10 (0.88-1.38)          | 933 (35.4)<br>HR 1.15 (1.03-1.34)     | 315 (12.0)<br>HR 0.70 (0.54-0.91)             |
| <b>Mild PHT<br/>(eRVSP 40.00-49.99)<br/>N = 2704</b>       | 376/2640 (14.2)<br>OR 1.45 (1.10-1.92)          | 974/1949 (50.0)<br>OR 1.58 (1.26-1.97)          | 1355 (50.1)<br>HR 1.54 (1.33-1.78)    | 506 (18.7)<br>HR 0.76 (0.59-0.98)             |
| <b>Moderate PHT<br/>(eRSVP 50.00 -59.99)<br/>N = 1294</b>  | 268/1245 (21.5)<br>OR 2.19 (1.64-2.93)          | 623/925 (67.4)<br>OR 2.77 (2.16-3.56)           | 741 (57.3)<br>HR 1.99 (1.71-2.32)     | 297 (23.0)<br>HR 1.12 (0.86-1.45)             |
| <b>Severe PHT<br/>(eRVSP &gt;60)<br/>N = 804</b>           | 289/791 (36.5)<br>OR 4.51 (3.36-6.06)           | 508/647 (78.5)<br>OR 5.18 (3.90-6.88)           | 574 (71.4)<br>HR 2.96 (2.52-3.47)     | 231 (28.7)<br>HR 1.50 (1.14-1.96)             |

Analyses adjusted for age and sex. Values are n (%) or n/M (%), unless otherwise indicated.

CI = confidence interval; eRVSP = estimated right ventricular systolic pressure; HR = hazard ratio; OR = odds ratio; PHT = pulmonary hypertension.

**Table 5. Survival Profile and Adjusted Risk for Mortality According to Estimated Right Ventricular Systolic Pressure Levels for females (n = 6038)**

|                                                    | <b>1-Year Actuarial Mortality (n= 5887)</b> | <b>5-Year Actuarial Mortality (n= 4186)</b> | <b>All Fatal Events (n= 6038)</b> | <b>Cardiovascular mortality (n= 6038)</b> |
|----------------------------------------------------|---------------------------------------------|---------------------------------------------|-----------------------------------|-------------------------------------------|
|                                                    | <b>OR (95% CI)</b>                          | <b>OR (95% CI)</b>                          | <b>HR (95% CI)</b>                | <b>HR (95% CI)</b>                        |
| <b>All individuals n= 9638</b>                     | 928 (15.8)                                  | 2158 (51.6)                                 | 2822 (46.7)                       | 1153 (19.1)                               |
| <b>Normal eRVSP (&lt;30mmHg) n = 611</b>           | 46/606 (7.6)<br>Reference                   | 113/365 (31.0)<br>Reference                 | 144 (23.6)<br>Reference           | 60 (9.8)<br>Reference                     |
| <b>Borderline PHT (eRVSP 30.00-39.99) N = 1773</b> | 167/1720 (9.7)<br>OR 1.12 (0.79-1.58)       | 469/1169 (40.1)<br>OR 1.26 (0.96-1.67)      | 653 (36.8)<br>HR 1.32 (1.10-1.58) | 248 (14.0)<br>HR 0.67 (0.51-0.89)         |
| <b>Mild PHT (eRVSP 40.00-49.99) N = 1992</b>       | 278/1950 (14.3)<br>OR 1.51 (1.09-2.11)      | 698/1439 (48.5)<br>OR 1.46 (1.12-1.91)      | 996 (50.0)<br>HR 1.53 (1.29-1.83) | 391 (19.6)<br>HR 0.64 (0.49-0.84)         |
| <b>Moderate PHT (eRSVP 50.00 - 59.99) N = 1011</b> | 205/973 (21.1)<br>OR 2.24 (1.59-3.16)       | 476/695 (68.5)<br>OR 2.91 (2.20-3.98)       | 567 (56.1)<br>HR 2.03 (1.69-2.44) | 246 (24.3)<br>HR 0.94 (0.71-1.25)         |
| <b>Severe PHT (eRVSP &gt;60) N = 651</b>           | 232/638 (36.4)<br>OR 4.65 (3.28-5.59)       | 402/518 (77.6)<br>OR 4.77 (3.43-6.62)       | 462 (71.0)<br>HR 2.92 (2.42-3.53) | 208 (32.0)<br>HR 1.23 (0.92-1.64)         |

Analyses adjusted for age. Values are n (%) or n/M (%), unless otherwise indicated. CI = confidence interval; eRVSP = estimated right ventricular systolic pressure; HR = hazard ratio; OR = odds ratio; PHT = pulmonary hypertension.

**Table 6. Survival Profile and Adjusted Risk for Mortality According to Estimated Right Ventricular Systolic Pressure Levels for males (n = 3645)**

|                                                    | <b>1-Year Actuarial Mortality (n= 3552)</b> | <b>5-Year Actuarial Mortality (n= 2594)</b> | <b>All Fatal Events (n= 3645)</b> | <b>Cardiovascular mortality (n= 3645)</b> |
|----------------------------------------------------|---------------------------------------------|---------------------------------------------|-----------------------------------|-------------------------------------------|
|                                                    | <b>OR (95% CI)</b>                          | <b>OR (95% CI)</b>                          | <b>HR (95% CI)</b>                | <b>HR (95% CI)</b>                        |
| <b>All individuals n= 9638</b>                     | 645 (18.5)                                  | 1445 (55.7)                                 | 1792 (49.2)                       | 624 (17.1)                                |
| <b>Normal eRVSP (&lt;30mmHg) n = 348</b>           | 33/344 (9.6)<br>Reference                   | 79/216 (36.6)<br>Reference                  | 144 (23.6)<br>Reference           | 60 (9.8)<br>Reference                     |
| <b>Borderline PHT (eRVSP 30.00-39.99) N = 1179</b> | 137/1149 (11.9)<br>OR 1.16 (0.77-1.74)      | 322/801 (40.2)<br>OR 1.06 (0.76-1.49)       | 653 (36.8)<br>HR 1.06 (0.85-1.31) | 248 (14.0)<br>HR 1.00 (0.64-1.55)         |
| <b>Mild PHT</b>                                    | 190/1138 (16.7)<br>OR 1.52 (1.02-2.27)      | 481/841 (57.2)<br>OR 1.82 (1.31-2.55)       | 996 (50.0)<br>HR 1.54 (1.25-1.90) | 391 (19.6)<br>HR 1.23 (0.80-1.90)         |

|                                                             |                                        |                                       |                                   |                                   |
|-------------------------------------------------------------|----------------------------------------|---------------------------------------|-----------------------------------|-----------------------------------|
| <b>(eRVSP 40.00-49.99)</b><br><b>N = 1175</b>               |                                        |                                       |                                   |                                   |
| <b>Moderate PHT (eRSVP 50.00 - 59.99)</b><br><b>N = 577</b> | 137/560 (24.5)<br>OR 2.20 (1.45-3.33)  | 311/434 (71.7)<br>OR 2.87 (1.97-4.17) | 567 (56.1)<br>HR 1.95 (1.56-2.43) | 246 (24.3)<br>HR 1.90 (1.22-2.96) |
| <b>Severe PHT (eRVSP &gt;60)</b><br><b>N = 366</b>          | 1488/361 (41.0)<br>OR 4.63 (3.03-7.07) | 252/302 (83.4)<br>OR 6.06 (3.90-9.41) | 462 (71.0)<br>HR 2.79 (2.21-3.50) | 208 (32.0)<br>HR 2.72 (1.74-4.28) |

Analyses adjusted for age. Values are n (%) or n/M (%), unless otherwise indicated. CI = confidence interval; eRVSP = estimated right ventricular systolic pressure; HR = hazard ratio; OR = odds ratio; PHT = pulmonary hypertension.

**Supplementary Table 7. Adjusted Risk for Mortality according to decile distribution of Estimated Right Ventricular Systolic Pressure Levels**

| <b>eRSVP decile distribution (mmHg)</b> | <b>All Fatal Events (n= 9638)<br/>HR (95% CI), p value</b> |
|-----------------------------------------|------------------------------------------------------------|
| 0.00-30.00                              | Reference                                                  |
| 30.01-34.00                             | 1.14 (0.97 – 1.34), p = 0.11                               |
| 34.01-37.04                             | 1.16 (1.00 – 1.36), p = 0.05                               |
| 37.05-39.16                             | 1.27 (1.08 – 1.48), p= 0.003                               |
| 39.17-43.00                             | 1.48 (1.29 – 1.72), p <0.0001                              |
| 43.01-46.00                             | 1.50 (1.30 – 1.72), p <0.0001                              |
| 46.01-48.44                             | 1.59 (1.36 – 1.85), p <0.0001                              |
| 48.45-53.00                             | 1.98 (1.71 – 2.29), p <0.0001                              |
| 53.01-61.00                             | 2.04 (1.76 – 2.35), p <0.0001                              |
| 61.01-143.63                            | 2.89 (2.51 – 3.32), p <0.0001                              |

Analyses adjusted for age and sex. eRVSP = estimated right ventricular systolic pressure; HR = hazard ratio; CI = confidence interval.
